# Supplementary material for: Is Oral Health All About Tooth Brushing? A Longitudinal Study in Individuals With Brain Injury in A Neurorehabilitation Setting
Source: Research Square preprint supplement (doi:10.21203/rs.3.rs-112535/v1), 2020-12-07
Supplement: Supplementary file 1 [file 004ed0efa3d3e35e905606fb.doc]

Supplementary information for

**Is oral health all about tooth brushing? A longitudinal study in individuals with brain injury in neurorehabilitation setting**

**Methods**

**Participants and recruitment**

In case, if the examination was not possible due to severe fatigue/ cognition/ limited mouth opening/ stress/ infection/ or any other reason otherwise mentioned, the project nurse and the dentist scheduled a second appointment to perform the assessment within week 1 or week 5´s time window, but once the week was over, the patients were excluded. Out of 132 individuals, 90 were eligible for the week 1 assessment, and 61 individuals were eligible for week 5 assessment after fulfilling all the above-mentioned eligibility criteria.

The study was part of a nursing quality development project. Hence, according to the Danish law, no ethical approval was required but permission of the institutional review board for clinical projects was taken and was performed in accordance with the Helsinki Declaration II.

**Procedures and measures**

1. ***Medical records***

Each individual’s *main diagnosis, medical history, the onset of brain injury, length of stay in acute care* were documented at week 1 and *onset of pneumonia during hospitalization*, clinically measured *body mass index (BMI)*, eating difficulties, *dysphagia and feeding status* were documented at week 1 and 5 from patients’ e-journal.

1. ***Demographics and socio-behavioral history***

A structured questionnaire was used to elicit general and oral health-related social and behavioral history. The questionnaire elicited information on *age, sex, education level,* *profession, living status, smoking habits, brushing and dental appointment frequencies,* which were recorded by a nurse (MBJ) at week 1 and in addition *brushing frequency during hospitalization* was again recorded at week 5.

1. ***Motor and cognitive deficits related to orofacial function parameters***

Motor and cognitive domains related to orofacial function were collected from the subset of the following brain injury scales at both baseline and at week 5: The Early Functional Ability (EFA) scale 1, the Functional Independent Measure (FIM) 2, 3, the *Functional Oral Intake Scales (FOIS)* 4, and the *Rancho Los Amigos Scale (RLAS)* 5. These scales are routinely used (every fourth week) as a part of clinical examination at our neurorehabilitation center to provide a functional overview of each patient with ABI. In our previous study, by employing a factor analysis approach on the questionnaire data and were able to identify two different factors: motor domain based on their orofacial health and entire cognitive domain (For a detailed description, see appendix and Kothari et al 6). Accordingly, a ‘motor’ factor, was defined on the basis of the scores of the eating domain of the FIM questionnaire, the total score of the FOIS questionnaire, and the orofacial stimulation, and swallowing domains of the EFA questionnaire. The ‘cognitive’ factor, comprised the total score of cognitive FIM which included, problem-solving, social interaction, comprehension, expression and memory domain and the total score of the RLAS questionnaire 6. As the tongue and mimic domains of the EFA questionnaire loaded in both the factors, they were not included in either of the factors. Further details about this analysis can be found elsewhere 6.

***d. Comprehensive oral health assessment***

The clinical oral examination was conducted by a trained dentist (SFK) during week 1 and week 5 of hospitalization. This examination consisted of *1) Plaque, calculus and BOP examination:* was performed at 6 sites of each tooth by tipping a University of North Carolina-15 periodontal probe (PCPUNC15, Hu-Freidy, Chicago, IL, USA) up to 1 mm below the gingival margin starting from the distal to mesial end of each tooth buccally and palatally/lingually respectively. *2) Bedside Oral Examination (BOE):* After permission from the author, *BOE* parameters were included 7. Total BOE scores ranged from 8 (excellent oral health) to 24 (poor oral health). BOE scores ranging from 8-10 are considered as indicative of excellent oral health, from 11-14 as moderately impaired oral health, and from 15-24 as significantly impaired oral health 7.

In addition, at baseline, we also assessed probing depth (PD), gingival margin level and clinical attachment level (CAL) with the use of the aforementioned probe. The baseline periodontal data was also submitted to factor analysis, which allowed us to identify two periodontal phenotypes, dubbed as ‘moderate’ and ‘severe’ periodontitis. Detailed information about the identification of the periodontal phenotypes using the baseline periodontal data can be found elsewhere 6.

**References**

1. Hankemeier A, Rollnik JD. The Early Functional Abilities (EFA) scale to assess neurological and neurosurgical early rehabilitation patients. *BMC Neurol* 2015;15:207.

2. Beninato M, Gill-Body KM, Salles S, Stark PC, Black-Schaffer RM, Stein J. Determination of the minimal clinically important difference in the FIM instrument in patients with stroke. *Arch Phys Med Rehabil* 2006;87:32-39.

3. Nichol AD, Higgins AM, Gabbe BJ, Murray LJ, Cooper DJ, Cameron PA. Measuring functional and quality of life outcomes following major head injury: common scales and checklists. *Injury* 2011;42:281-287.

4. Crary MA, Mann GD, Groher ME. Initial psychometric assessment of a functional oral intake scale for dysphagia in stroke patients. *Arch Phys Med Rehabil* 2005;86:1516-1520.

5. Lin K, Wroten M. Ranchos Los Amigos. In: *StatPearls*. Treasure Island (FL): StatPearls Publishing LLC., 2020.

6. Kothari S, Nascimento G, Jakobsen M, Nielsen J, Kothari M. Periodontitis and orofacial health-related systemic impairment in patients with brain injury: A factor analysis approach. *J Periodontol (under review)* 2020.

7. Prendergast V, Kleiman C, King M. The Bedside Oral Exam and the Barrow Oral Care Protocol: translating evidence-based oral care into practice. *Intensive Crit Care Nurs* 2013;29:282-290.
